# Supplementary material
Source: publisher figshare collection journal article supplement (https://aacr.figshare.com/articles/dataset/_/22429945)
Supplement: Supplementary file 1 [file 39876280]

**Fig S4.**

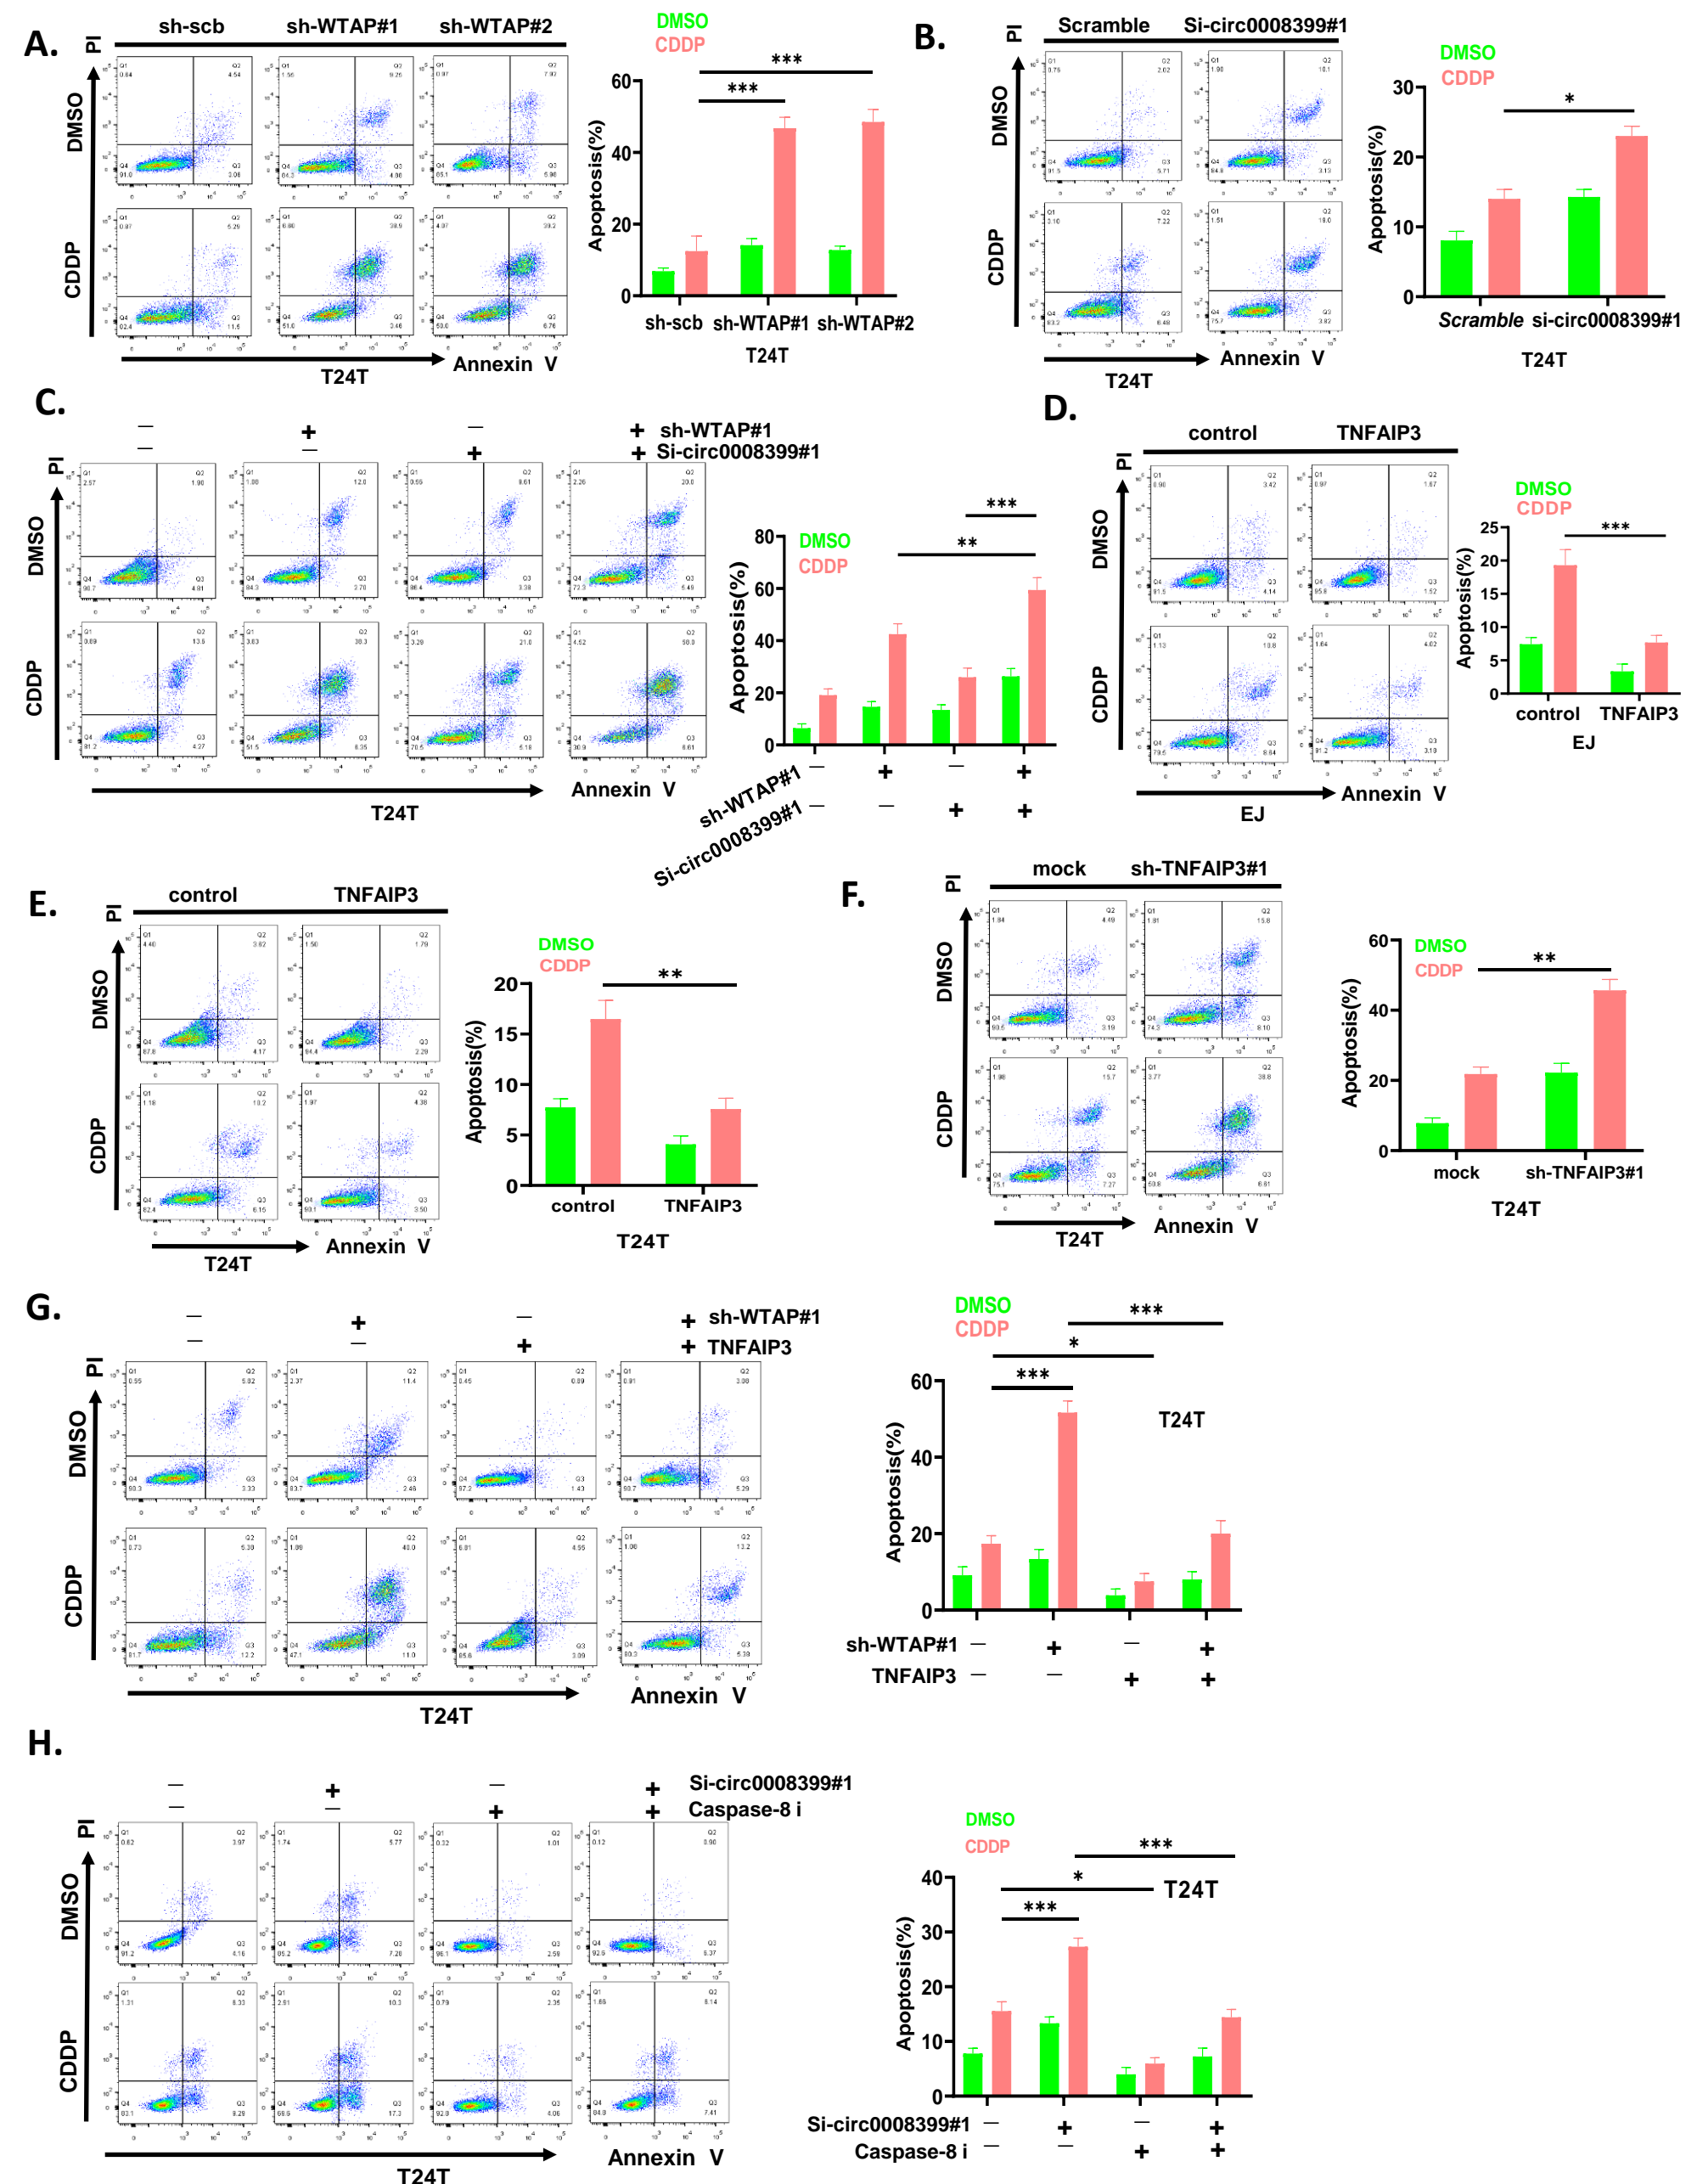

**Supplementary Fig.4 Knockdown of circ0008399/WTAP/TNFAIP3 pathway decreases the chemosensitivity of BC cells to CDDP.**

**(A)** Flow cytometry assay depicted the CDDP-induced apoptosis rate of T24T cells stably transfected with sh-scb, sh-WTAP#1 or sh-WTAP#2. Cells were treated with 5  $\mu$ M CDDP for 24h.

**(B)** Flow cytometry assay showed the CDDP-mediated apoptosis rate in T24T cells transfected with scramble or si-circ0008399. Cells were treated with 5  $\mu$ M CDDP for 24h.

**(C)** Flow cytometry assay revealed the CDDP effect in T24T cells stably transfected with sh-scb or sh-WTAP#1, and those co-transfected with scramble or si-circ0008399#1. Cells were treated with 5  $\mu$ M CDDP for 24h.

**(D-E)** Flow cytometry assay showed the CDDP effect in EJ **(D)** and T24T **(E)** cells stably transfected with control or TNFAIP3.

**(F)** Flow cytometry assay depicted CDDP-induced apoptosis of T24T cells stably transfected with mock or sh-TNFAIP3#1. Cells were treated with 5  $\mu$ M CDDP for 24h.

**(G)** Flow cytometry assay revealed the CDDP chemosensitivity in T24T cells stably transfected with sh-scb or sh-WTAP#1, and those co-transfected with control or TNFAIP3. Cells were treated with 5  $\mu$ M CDDP for 24h.

**(H)** T24T cells were transfected with scramble or si-circ0008399#1, and those treated with or without caspase-8 inhibitor (0.5 $\mu$ M). After cells were treated for 24 h with or without CDDP (5  $\mu$ M), cell apoptosis was measured by flow cytometry assay.

Data are presented as the means  $\pm$  SD from three independent experiments. \*P < 0.05; \*\*P < 0.01; \*\*\*P < 0.001 (Student's t test)
